# Supplementary material
Source: PubMed Central journal article supplement (PMC3436308)

## **Legends to supplementary figures:**

**Supplementary Table 1.** Cells were seeded at a density of  $1 \times 10^4$  cells/well in 24-well culture plates and on the following day treated with 1 $\mu$ M FZ for 24h. Cells were then trypsinized, viable cells were counted by the trypan blue exclusion method and percentage of surviving cells was calculated. All experiments were done in triplicate.

**Supplementary Fig.1.** Human H460 or A549 cells were plated onto 96-well tissue culture plates. Cells were left untreated or treated with different doses of FZ or bortezomib for 48 h. Cell viability was determined by MTT assay.

**Supplementary Fig.2.** Normal immortalized human prostate cells RWPE or mouse primary fibroblasts were seeded onto 96-well tissue culture plates. Cells were left untreated or treated with indicated doses of FZ for 48 h. MTT assay was done to determine cell viability.

**Supplementary Fig.3.** H460 cell extracts were incubated with FZ and then processed for chymotrypsin like protease activity in a dose or time dependent manner using a specific fluorogenic protease substrate.

**Supplementary Fig.4.** H460 and A549 cells were plated onto 96 well plates. On the following day, the cells were either left untreated or treated with IKK inhibitor wedelolactone (10 $\mu$ M), TNF $\alpha$  (30ng/ml) or FZ (1 $\mu$ M) as indicated. Cell viability was measured by MTT assay after 24h.

**Supplementary Table 1**

| <b>Cell line</b> | <b>% survival after FZ treatment*</b> |
|------------------|---------------------------------------|
| HOS              | 56.8                                  |
| HT29             | 56.9                                  |
| MCF-7            | 44.0                                  |
| H226             | 41.7                                  |
| H460             | 39.0                                  |
| A549             | 45.6                                  |
| H322             | 67.1                                  |
| HeLa             | 88.5                                  |
| MDA 453          | 51.7                                  |
| SiHa             | 86.7                                  |
| HCT116           | 62.1                                  |
| SW480            | 70.2                                  |
| SK-OV433         | 59.7                                  |
| H226Br           | 79.6                                  |
| A431             | 66.7                                  |
| Du145            | 69.6                                  |
| Saos-2           | 76.4                                  |
| H1299            | 82.9                                  |
| Hep 3B           | 78.9                                  |
| HepG2            | 82.6                                  |
| H596             | 86.2                                  |
| H358             | 87.5                                  |
| MDA231           | 65.0                                  |
| HT1080           | 54.4                                  |
| RD               | 77.9                                  |

\* 24h after 1uM FZ treatment

**Supplementary Fig.1**

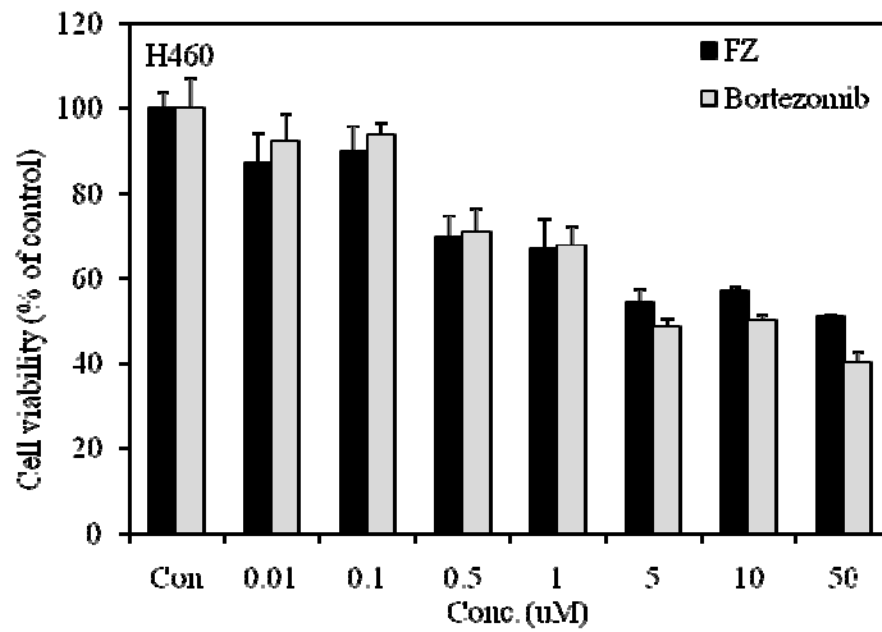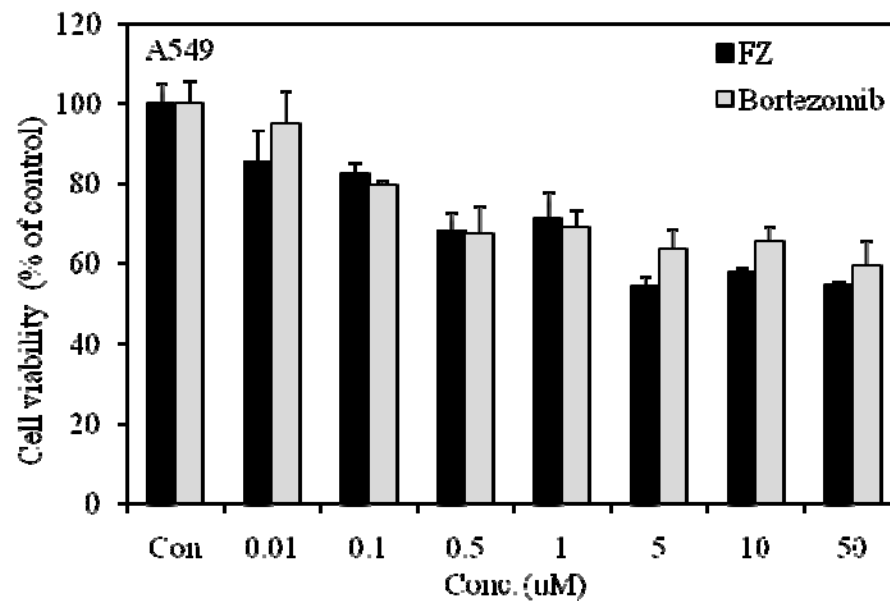

**Supplementary Fig.2**

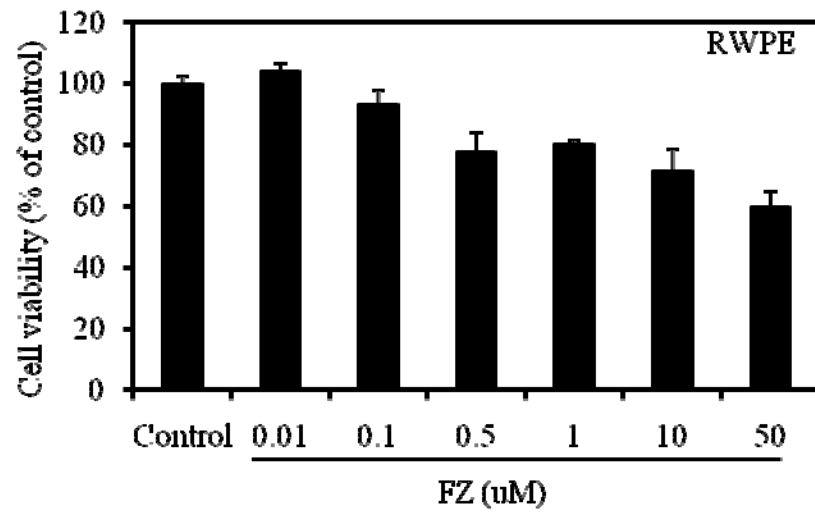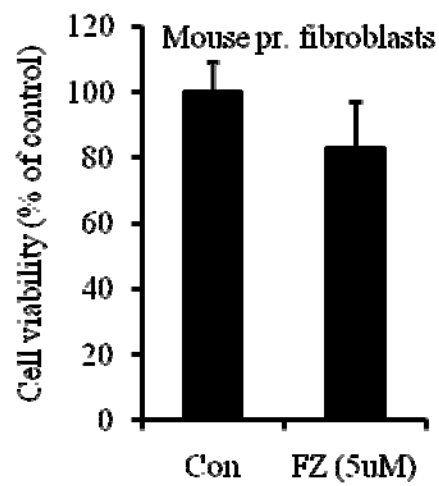

**Supplementary Fig.3**

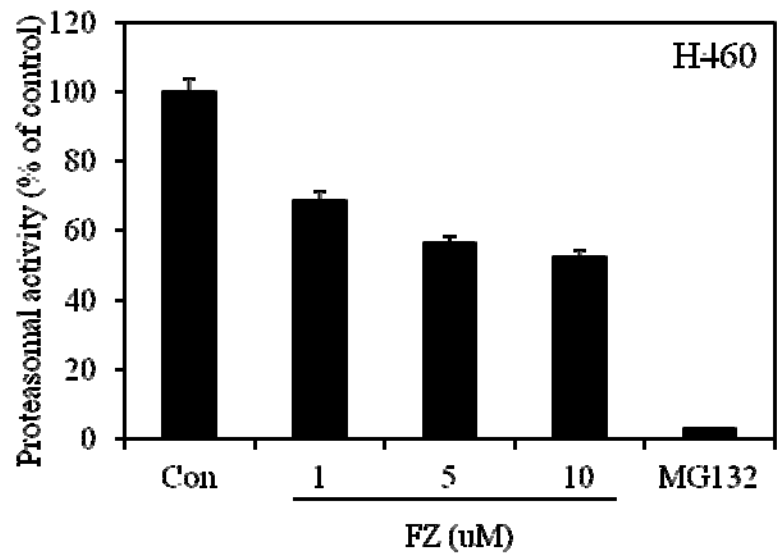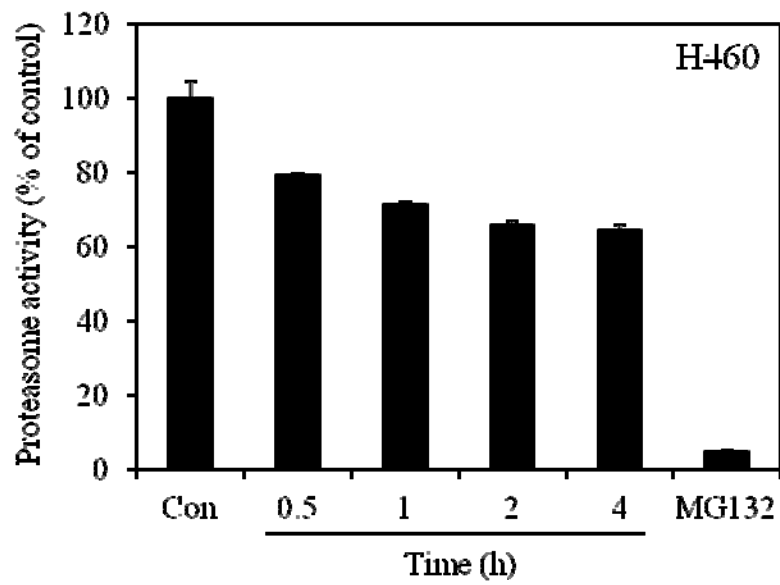

**Supplementary Fig.4**

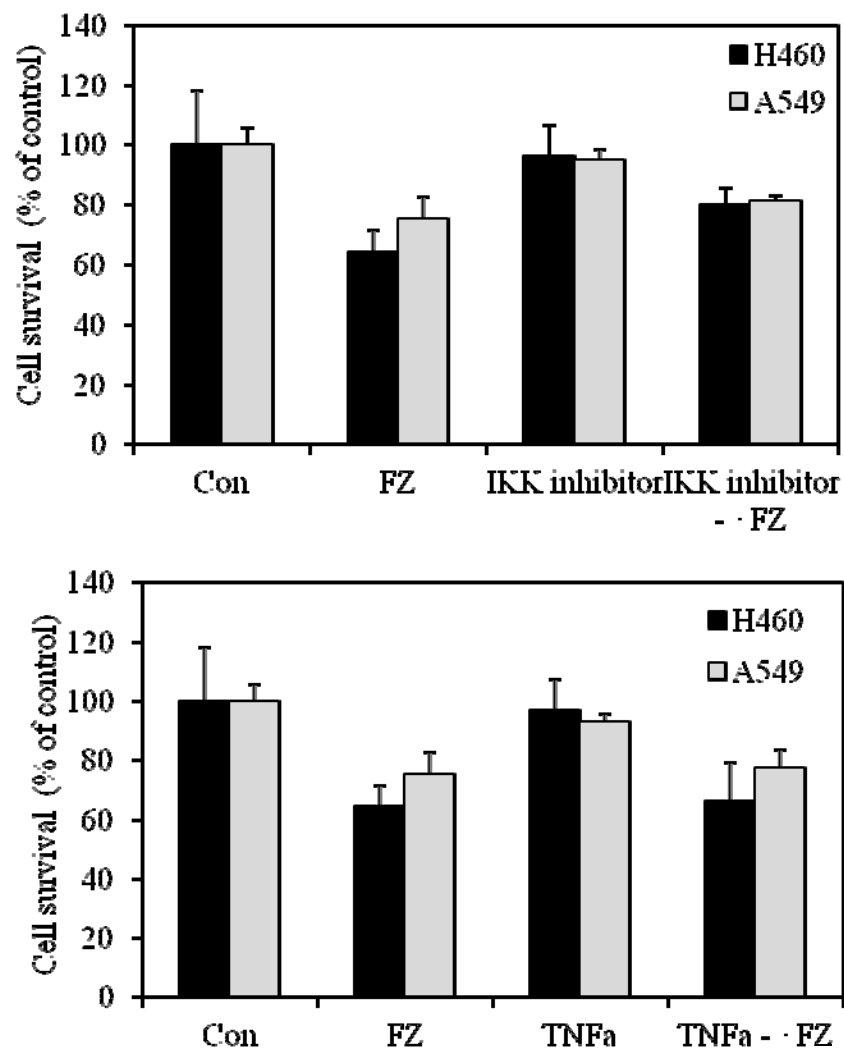

Supplement: supp_M111.324228_supplementary_2.pdf [file supp_M111.324228_supplementary_2.pdf]
